# Supplementary material
Source: publisher figshare collection journal article supplement (https://tandf.figshare.com/articles/dataset/_/10007636)
Supplement: Supplementary file 1 [file 1]

Archive with 3 entries (3 files):
- ijmf_a_1677593_sm3531.docx
- ijmf_a_1677593_sm3530.docx
- ijmf_a_1677593_sm3529.pdf
