# Supplementary material
Source: publisher figshare collection journal article supplement (https://tandf.figshare.com/articles/dataset/_/10007636)
Supplement: Supplementary file 1 [file 1 › ijmf_a_1677593_sm3529.pdf]

# Vacuum and Forceps Assisted Vaginal Delivery Education in Residency and Fellowship

Vacuum and Forceps Education for OBGYN Residents and Fellows: A Look at the Current Training Paradigm

Dr. Christina Han, Dr. Yalda Afshar and Dr. Kelsey Rose, from the OBGYN department at the University of California, Los Angeles (UCLA) are conducting a research study.

You were selected as a possible participant in this study because you are a current OBGYN resident or MFM fellow. Your participation in this research study is voluntary.

## DESCRIPTION OF STUDY

The study will involve OBGYN residents and MFM fellows completing a short 5-minute survey to evaluate their training in operative vaginal deliveries, especially forceps assisted vaginal deliveries.

## PARTICIPATION

Participation is voluntary. There is no payment for your participation. You can choose whether or not you want to be in this study, and you may withdraw your consent and discontinue participation at any time. Whatever decision you make, there will be no penalty to you, and no loss of benefits to which you were otherwise entitled. You may refuse to answer any questions that you do not want to answer and still remain in the study.

## POTENTIAL RISK AND BENEFITS

The benefit of this study is to understand forceps assisted vaginal delivery training across the United States. There are no risks to participating in this study.

## CONFIDENTIALITY

All surveys will be anonymous. No identifiable information will be collected. However, we request that you list your year in training.

Any information that is obtained in connection with this study and that can identify you will remain confidential. It will be disclosed only with your permission or as required by law.

If you have any questions please feel free to contact Dr. Kelsey Rose ([karose@mednet.ucla.edu](mailto:karose@mednet.ucla.edu)), Yalda Afshar ([yafshar@mednet.ucla.edu](mailto:yafshar@mednet.ucla.edu)) or Dr. Christina Han ([cshan@mednet.ucla.edu](mailto:cshan@mednet.ucla.edu)) at University of California, Los Angeles.

UCLA Office of the Human Research Protection Program (OHRPP):

talk to someone other than the researchers, you may contact the UCLA OHRPP by phone: (310) 206-2040; by email: [participants@research.ucla.edu](mailto:participants@research.ucla.edu) or by mail: Box 951406, Los Angeles, CA 90095-1406.

- 
- |                                                                         |                                                                                                                                                                       |
|-------------------------------------------------------------------------|-----------------------------------------------------------------------------------------------------------------------------------------------------------------------|
| 1) Number of vaginal deliveries to date                                 | <input type="radio"/> 0 - 100<br><input type="radio"/> 101 - 200<br><input type="radio"/> 201 - 300<br><input type="radio"/> 300 - 301<br><input type="radio"/> > 300 |
| <hr/>                                                                   |                                                                                                                                                                       |
| 2) Number of cesarean deliveries to date                                | <input type="radio"/> 0 - 100<br><input type="radio"/> 101 - 200<br><input type="radio"/> 201 - 300<br><input type="radio"/> 300 - 301<br><input type="radio"/> > 300 |
| <hr/>                                                                   |                                                                                                                                                                       |
| 3) Number of vacuum-assisted vaginal deliveries to date                 | <input type="radio"/> 0 -10<br><input type="radio"/> 11-20<br><input type="radio"/> 21-30<br><input type="radio"/> 31-40<br><input type="radio"/> >40                 |
| <hr/>                                                                   |                                                                                                                                                                       |
| 4) Number of forceps-assisted vaginal deliveries to date                | <input type="radio"/> 0 -10<br><input type="radio"/> 11-20<br><input type="radio"/> 21-30<br><input type="radio"/> 31-40<br><input type="radio"/> >40                 |
| <hr/>                                                                   |                                                                                                                                                                       |
| 5) Which are/were you most interested in learning during your training? | <input type="radio"/> Forceps<br><input type="radio"/> Vacuum<br><input type="radio"/> Both Equally<br><input type="radio"/> Neither                                  |
| <hr/>                                                                   |                                                                                                                                                                       |
| 6) Who predominantly taught you forceps deliveries?                     | <input type="radio"/> MFM Fellows<br><input type="radio"/> MFM Attendings<br><input type="radio"/> Generalist Attendings<br><input type="radio"/> All equally         |

**How many deliveries have you performed using each of the following types of forceps?**

|                   | 0                     | 1-2                   | 3-5                   | 6-10                  | >10                   |
|-------------------|-----------------------|-----------------------|-----------------------|-----------------------|-----------------------|
| 7) Simpson        | <input type="radio"/> |
| 8) Elliots        | <input type="radio"/> |
| 9) DeLee          | <input type="radio"/> |
| 10) Tucker-McLean | <input type="radio"/> |
| 11) Kielland      | <input type="radio"/> |
| 12) Pipers        | <input type="radio"/> |
| 13) I don't know  | <input type="radio"/> |

14) Have you ever participated in an operative delivery simulation for vacuum, forceps or both?

- ☐ Forceps  
☐ Vacuum  
☐ Both  
☐ Neither

15) Do you currently feel prepared to perform vacuum deliveries?

- ☐ Yes, independently  
☐ Yes, but with supervision  
☐ No

16) Do you currently feel prepared to perform forceps deliveries?

- ☐ Yes, independently  
☐ Yes, but with supervision  
☐ No

17) When you enter clinical practice, which method would you choose to use predominantly?

- ☐ Forceps  
☐ Vacuum  
☐ Both equally  
☐ Neither

---

18) In which state do you train?

- ☐ Alabama
- ☐ Alaska
- ☐ Arizona
- ☐ Arkansas
- ☐ California
- ☐ Colorado
- ☐ Connecticut
- ☐ Delaware
- ☐ Florida
- ☐ Georgia
- ☐ Hawaii
- ☐ Idaho
- ☐ Illinois
- ☐ Indiana
- ☐ Iowa
- ☐ Kansas
- ☐ Kentucky
- ☐ Louisiana
- ☐ Maine
- ☐ Maryland
- ☐ Massachusetts
- ☐ Michigan
- ☐ Minnesota
- ☐ Mississippi
- ☐ Missouri
- ☐ Montana
- ☐ Nebraska
- ☐ Nevada
- ☐ New Hampshire
- ☐ New Jersey
- ☐ New Mexico
- ☐ New York
- ☐ North Carolina
- ☐ North Dakota
- ☐ Ohio
- ☐ Oklahoma
- ☐ Oregon
- ☐ Pennsylvania
- ☐ Rhode Island
- ☐ South Carolina
- ☐ South Dakota
- ☐ Tennessee
- ☐ Texas
- ☐ US Territory
- ☐ Utah
- ☐ Vermont
- ☐ Virginia
- ☐ Washington
- ☐ West Virginia
- ☐ Wisconsin
- ☐ Wyoming
- ☐ Washington D.C.

---

19) How do you best identify yourself?

- ☐ Female
- ☐ Male
- ☐ Other
- ☐ Decline to state

---

20) What year is residency or fellowship are you?

- ☐ PGY1
- ☐ PGY2
- ☐ PGY3
- ☐ PGY4
- ☐ PGY5
- ☐ PGY6
- ☐ PGY7 or greater
