# Supplementary material
Source: publisher figshare collection journal article supplement (https://tandf.figshare.com/articles/dataset/_/10007636)
Supplement: Supplementary file 1 [file 1 › ijmf_a_1677593_sm3530.docx]

Supplement 3.

Table 5. Breakdown of FAVD experience by type of forceps and PGY (N=434)

|  | Total | PGY-1 and 2 | PGY-3 | PGY-4 |  |
| --- | --- | --- | --- | --- | --- |
|  | N=434 | n=195 | n=114 | n=125 | p-value |
| **Number of times use   Simpson** |  |  |  |  |  |
| 0 | 45% (189) | 72% (140) | 23% (26) | 18% (23) | <0.0001 |
| 1-2 | 22% (93) | 16% (32) | 35% (40) | 17% (21) |  |
| 3-5 | 13% (54) | 6% (11) | 19% (22) | 17% (21) |  |
| 6-10 | 9% (38) | 3% (6) | 10% (11) | 17% (21) |  |
| >10 | 10% (43) | 2% (3) | 7% (8) | 26% (32) |  |
| **Number of times   used Elliot forceps** |  |  |  |  |  |
| 0 | 90% (344) | 90% (176) | 76% (87) | 65% (81) | <0.0001‡ |
| 1-2 | 7% (25) | 2% (4) | 7% (8) | 10% (13) |  |
| 3-5 | 4% (15) | 1% (1) | 2% (2) | 10% (12) |  |
| **Number of times use   DeLee forceps** |  |  |  |  |  |
| 0 | 99% (376) | 91% (177) | 85% (97) | 82% (102) | 0.80§ |
| 1-2 | 1% (3) | 1% (2) | 0% (0) | 1% (1) |  |
| **Number of times used   Tucker-McLean forceps** |  |  |  |  |  |
| 0 | 64% (258) | 82% (159) | 51% (58) | 33% (41) | <0.0001|| |
| 1-2 | 22% (87) | 10% (20) | 28% (32) | 28% (35) |  |
| 3-5 | 8% (34) | 2% (4) | 8% (9) | 17% (21) |  |
| 6-10 | 4% (18) | 0% (0) | 4% (5) | 10% (13) |  |
| >10 | 1% (6) | 0% (0) | 2% (2) | 3% (4) |  |
| **Number of times used   Kieland forceps** |  |  |  |  |  |
| 0 | 88% (337) | 89% (173) | 77% (88) | 61% (76) | <0.0001‡ |
| 1-2 | 10% (40) | 4% (7) | 8% (9) | 19% (24) |  |
| 3-5 | 2% (6) | 0% (0) | 1% (1) | 4% (5) |  |
| 6-10 | 0% (1) | 0% (0) | 0% (0) | 1% (1) |  |
| >10 | 0% (1) | 1% (1) | 0% (0) | 0% (0) |  |
| **Number of times use   Piper forceps** |  |  |  |  |  |
| 0 | 83% (325) | 86% (168) | 67% (76) | 65% (81) | <0.0001‡ |
| 1-2 | 16% (61) | 8% (15) | 16% (18) | 22% (28) |  |
| 3-5 | 2% (6) | 0% (0) | 3% (3) | 2% (3) |  |

‡. Chi-square test: 0 vs. >0

§. Fisher's Exact test

||. Chi-square test: 0 vs. 1-2 vs. >3
