# Supplementary material
Source: publisher figshare collection journal article supplement (https://tandf.figshare.com/articles/dataset/_/10007636)
Supplement: Supplementary file 1 [file 1 › ijmf_a_1677593_sm3531.docx]

Supplement 4

Table 6. Breakdown of FAVD experience by type of forceps and region of training (N=434)

|  | Midwest  n=103 | Northeast  n=117 | South  n=105 | West  n=94 | p |
| --- | --- | --- | --- | --- | --- |
| **Number of times use  Simpson** |  |  |  |  |  |
| 0 | 21% (22) | 59% (69) | 49% (51) | 43% (40) | <0.0001 |
| 1-2 | 26% (27) | 18% (21) | 17% (18) | 24% (23) |  |
| 3-5 | 12% (12) | 9% (10) | 14% (15) | 17% (16) |  |
| 6-10 | 13% (13) | 3% (4) | 11% (12) | 9% (8) |  |
| >10 | 25% (26) | 3% (4) | 8% (8) | 3% (3) |  |
| **Number of times used   Elliot forceps** |  |  |  |  |  |
| 0 | 80% (82) | 81% (95) | 77% (81) | 76% (71) | 0.94 |
| 1-2 | 4% (4) | 6% (7) | 8% (8) | 6% (6) |  |
| 3-5 | 4% (4) | 3% (4) | 3% (3) | 4% (4) |  |
| **Number of times use   DeLee forceps** |  |  |  |  |  |
| 0 | 87% (90) | 86% (101) | 85% (89) | 86% (81) | 0.35 |
| 1-2 | 1% (1) | 0% (0) | 2% (2) | 0% (0) |  |
| **Number of times used   Tucker-McLean forceps** |  |  |  |  |  |
| 0 | 67% (69) | 68% (80) | 50% (52) | 52% (49) | 0.06‡ |
| 1-2 | 17% (18) | 15% (17) | 25% (26) | 22% (21) |  |
| 3-5 | 6% (6) | 10% (12) | 8% (8) | 7% (7) |  |
| 6-10 | 3% (3) | 1% (1) | 8% (8) | 6% (6) |  |
| >10 | 1% (1) | 0% (0) | 3% (3) | 2% (2) |  |
| **Number of times used   Kieland forceps** |  |  |  |  |  |
| 0 | 73% (75) | 83% (97) | 76% (80) | 76% (71) | 0.32§ |
| 1-2 | 17% (17) | 3% (3) | 10% (10) | 10% (9) |  |
| 3-5 | 0% (0) | 0% (0) | 5% (5) | 1% (1) |  |
| 6-10 | 1% (1) | 0% (0) | 0% (0) | 0% (0) |  |
| >10 | 0% (0) | 0% (0) | 0% (0) | 1% (1) |  |
| **Number of times use   Piper forceps** |  |  |  |  |  |
| 0 | 80% (82) | 78% (91) | 70% (74) | 69% (65) | 0.22§ |
| 1-2 | 13% (13) | 11% (13) | 16% (17) | 17% (16) |  |
| 3-5 | 1% (1) | 0% (0) | 3% (3) | 2% (2) |  |

‡ Chi-square test: 0 vs. 1-2 vs. >3

§ Chi-square test: 0 vs.>0
